# Supplementary material for: Circulating SPINT1 Is Reduced in a Preeclamptic Cohort with Co-Existing Fetal Growth Restriction
Source: MDPI journal article supplement (doi:10.3390/jcm11040901), 2022-02-09
Supplement: s1 [file s1]

# **Supplementary Materials for**

## **“Circulating SPINT1 is reduced in a preeclamptic cohort with co-existing fetal growth restriction”**

Ciara N. Murphy, Catherine A. Cluver, Susan P. Walker, Emerson Keenan, Roxanne Hastie, Teresa M. MacDonald, Natalie J. Hannan, Fiona C. Brownfoot, Ping Cannon, Stephen Tong and Tu'uhevaha J. Kaitu'u-Lino

**Supplementary Table S1: PIE patient characteristics.** Samples from pregnancies which culminated in the delivery of an infant with a birthweight centile  $\geq 10$ th classified as AGA ‘controls’, and those  $< 10$ th centile categorised as SGA. BMI data not available for 3 SGA samples.

\*  $p < 0.05$ , \*\*  $p < 0.01$ , \*\*\*\*  $p < 0.0001$ .

|                                |                                                               | AGA<br>n=22         | SGA<br>n=75           |
|--------------------------------|---------------------------------------------------------------|---------------------|-----------------------|
|                                | gestation at sampling (days)<br>median (IQR)                  | 206 (198-215)       | 204 (191-214)         |
|                                | gestation at delivery (days)<br>median (IQR)                  | 236 (215-239)       | 219 (204-230) **      |
|                                | interval between sampling and delivery (days)<br>median (IQR) | 20 (12-33)          | 14 (6-21) *           |
|                                | birth weight (g)<br>mean (SEM)                                | 1936 (102.7)        | 1234 (37.8) ****      |
|                                | maternal age (years)<br>mean (SEM)                            | 31 (1.5)            | 27 (0.7) *            |
|                                | BMI (kg/m <sup>2</sup> )<br>median (IQR)                      | 32.5 (27.7-38.0)    | 28.7 (23.8-33.9) *    |
| treatment<br>no. (%)           | placebo                                                       | 13 (59)             | 37 (49)               |
|                                | esomeprazole                                                  | 9 (41)              | 38 (51)               |
| parity<br>no. (%)              | 0                                                             | 6 (27)              | 31 (41)               |
|                                | 1                                                             | 6 (27)              | 21 (28)               |
|                                | $\geq 2$                                                      | 10 (46)             | 23 (31)               |
| blood pressure<br>median (IQR) | highest systolic BP<br>before delivery (mmHg)                 | 156.5 (148.3-159.3) | 159.0 (154.0-169.0) * |
|                                | highest diastolic BP<br>before delivery (mmHg)                | 101.0 (91.8-104.0)  | 102.0 (97.0-108.0)    |
| tobacco use<br>no. (%)         | smoker                                                        | 2 (9)               | 6 (8)                 |
|                                | former smoker                                                 | 1 (5)               | 7 (9)                 |
|                                | non-smoker                                                    | 19 (86)             | 62 (83)               |
| HIV status<br>no. (%)          | negative                                                      | 16 (73)             | 64 (85)               |
|                                | positive                                                      | 6 (27)              | 11 (15)               |

**Supplementary Table S2: PI-2 patient characteristics.** Samples from pregnancies which culminated in the delivery of an infant with a birthweight centile  $\geq 10^{\text{th}}$  classified as AGA ‘controls’, and those  $< 10^{\text{th}}$  centile categorised as SGA. BMI data not available for 1 SGA sample.

\*  $p < 0.05$ , \*\*  $p < 0.01$ , \*\*\*  $p < 0.001$ , \*\*\*\*  $p < 0.0001$ .

|                                |                                                               | AGA<br>n=40      | SGA<br>n=95        |
|--------------------------------|---------------------------------------------------------------|------------------|--------------------|
|                                | gestation at sampling (days)<br>median (IQR)                  | 231 (222-233)    | 219 (205-230) **   |
|                                | gestation at delivery (days)<br>median (IQR)                  | 239 (237-240)    | 227 (212-239) **** |
|                                | interval between sampling and delivery (days)<br>median (IQR) | 7 (5-10)         | 5 (4-7) **         |
|                                | birth weight (g)<br>mean (SEM)                                | 2343 (111.1)     | 1374 (40.84) ****  |
|                                | maternal age (years)<br>mean (SEM)                            | 28.7 (0.6)       | 31.2 (0.9) *       |
|                                | BMI (kg/m <sup>2</sup> )<br>median (IQR)                      | 32.0 (25.8-38.8) | 29.4 (25.0-35.5)   |
| treatment<br>no. (%)           | placebo                                                       | 18 (45)          | 45 (47)            |
|                                | metformin                                                     | 22 (55)          | 50 (53)            |
| parity<br>no. (%)              | 0                                                             | 9 (22.5)         | 27 (28.4)          |
|                                | 1                                                             | 8 (20)           | 31 (32.6)          |
|                                | $\geq 2$                                                      | 23 (57.5)        | 37 (38.9)          |
| blood pressure<br>median (IQR) | highest systolic BP<br>before delivery (mmHg)                 | 150 (146-159)    | 159 (152-169) **** |
|                                | highest diastolic BP<br>before delivery (mmHg)                | 91 (83-97)       | 98 (91-101) ***    |
| tobacco use<br>no. (%)         | smoker                                                        | 5 (12.5)         | 13 (13.7)          |
|                                | former smoker                                                 | 1 (2.5)          | 4 (4.2)            |
|                                | non-smoker                                                    | 34 (85)          | 78 (82.1)          |
| HIV status<br>no. (%)          | negative                                                      | 27 (67.5)        | 79 (83.2)          |
|                                | positive                                                      | 13 (32.5)        | 16 (16.8)          |
